# Supplementary material for: Structural Basis for Multiple Sugar Recognition of Jacalin-related Human ZG16p Lectin
Source: PubMed Central journal article supplement (PMC4059138; doi:10.1074/jbc.m113.539114), 2014-04-30
Supplement: supp_M113.539114_jbc.M113.539114-3.pdf [file supp_M113.539114_jbc.M113.539114-3.pdf]

## Supplementary Microarray Data

Glycan microarray analyses of ZG16p-MBP-His and MBP-His using a microarray of 492 lipid-linked oligosaccharide probes (Array Sets 32-39)

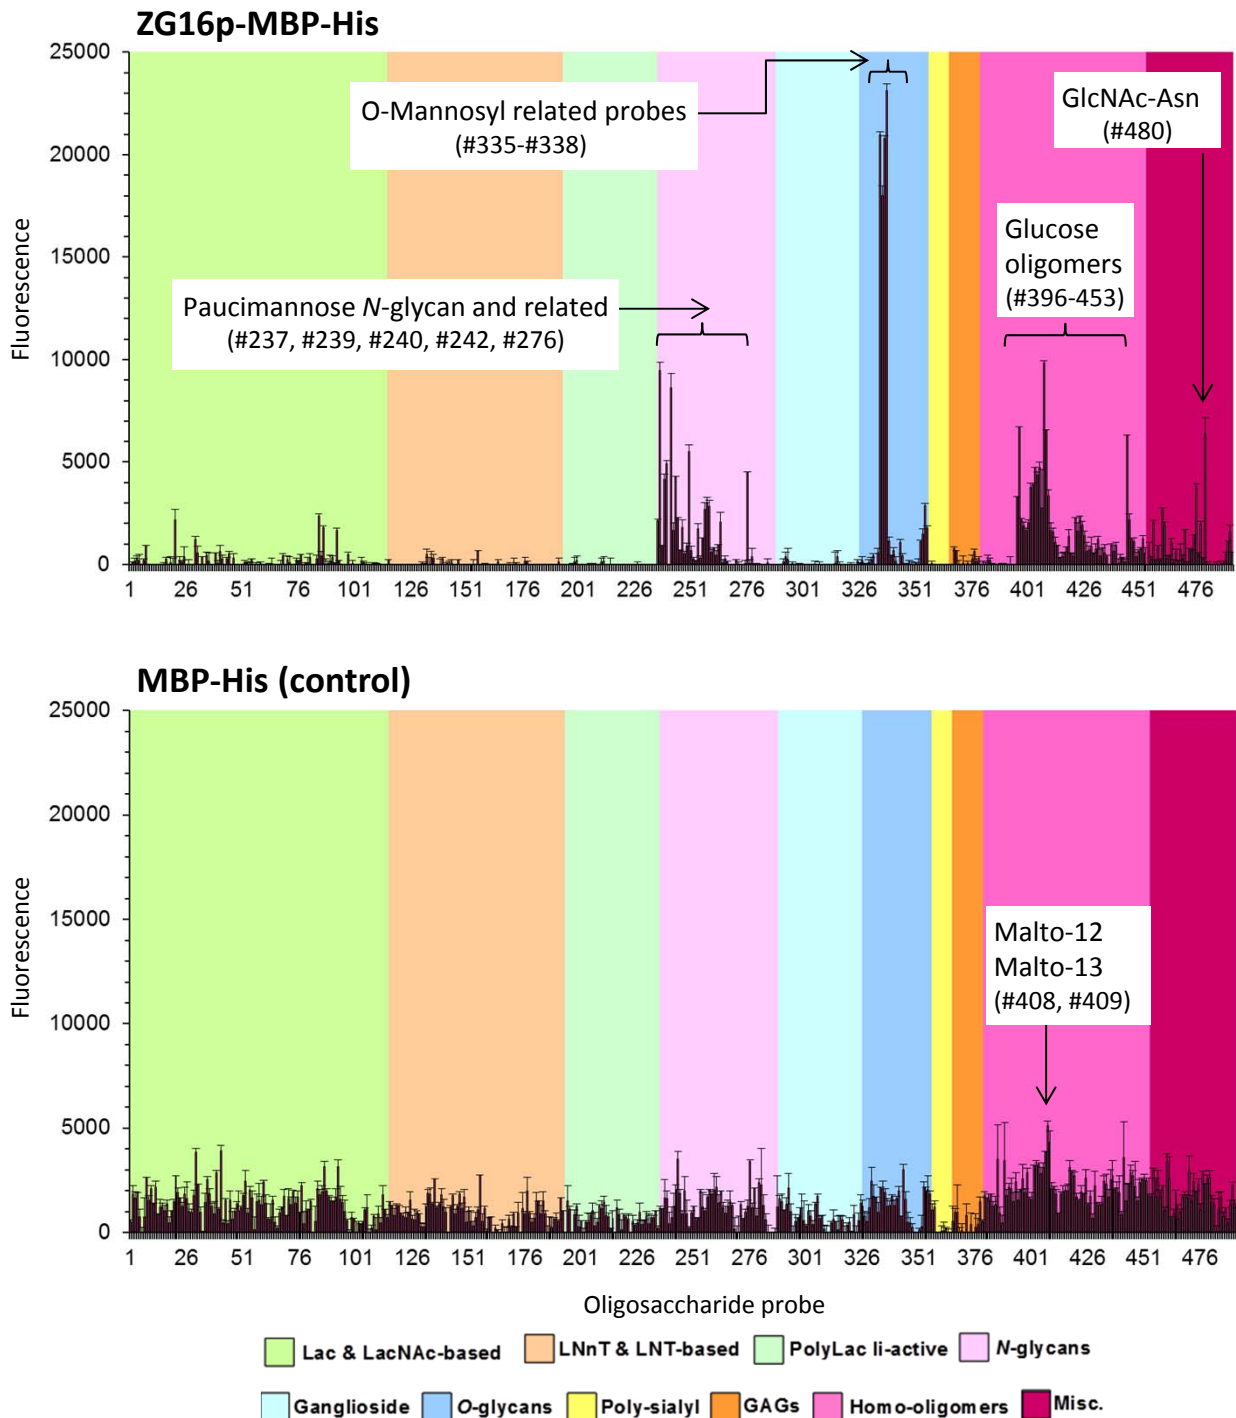

Numerical scores of the binding signals are means of duplicate spots at 5 fmol/spot (with error bars). The probes are arranged according to backbone types which are indicated by the colored panels as defined at the bottom of the figure. The list of probes and their sequences and binding scores are provided in table following the charts.

Oligosaccharide probes investigated in initial glycan microarray screening analysis, sorted by backbone sequence, and the binding signals (means of the fluorescence intensity at 5 fmol per probe spot) of His-MBP-ZG16p and His-MBP.

| Position | Probe                               | Structure                                                                                                | ZG16p binding | His-MBP |
|----------|-------------------------------------|----------------------------------------------------------------------------------------------------------|---------------|---------|
| 1        | Galactocerebrosides                 | Gal $\beta$ -Cer                                                                                         | -             | 502     |
| 2        | H-Di                                | Fuca-2Gal-DH<br>GalNAc-3Gal-DH                                                                           | 85            | 1,859   |
| 3        | A-Tri                               | Fuca-2<br>Gal $\alpha$ -3Gal-DH                                                                          | 164           | 1,671   |
| 4        | B-Tri                               | Fuca-2<br>Gal $\alpha$ -3Gal-AO                                                                          | 278           | 1,901   |
| 5        | B-Tri-AO                            | Fuca-2                                                                                                   | 200           | 753     |
| 6        | GSC-426                             | 3-deoxy, 3-carboxymethyl-Gal $\beta$ -C30                                                                | -             | -       |
| 7        | Sulfatide                           | SU-3Gal $\beta$ -Cer                                                                                     | 186           | 732     |
| 8        | GSF-1                               | SU-3Gal $\beta$ -C30                                                                                     | 939           | 2,636   |
| 9        | GSC-209                             | GlcA $\beta$ -3Gal $\beta$ -Cer42                                                                        | -             | 1,543   |
| 10       | GSC-210                             | SU-3GlcA $\beta$ -3Gal $\beta$ -Cer42                                                                    | -             | 2,115   |
| 11       | GSC-187                             | NeuAc $\alpha$ -3Gal $\beta$ -C29                                                                        | -             | 1,386   |
| 12       | GSC-40                              | NeuAc $\alpha$ -(S)-3Gal $\beta$ -Cer42                                                                  | -             | 2,168   |
| 13       | GSC-230                             | NeuAc $\alpha$ -8NeuAc $\alpha$ -3Gal $\beta$ -Cer36                                                     | -             | 868     |
| 14       | GSC-27                              | NeuAc $\alpha$ -6Gal $\beta$ -Cer36                                                                      | -             | 1,236   |
| 15       | GSC-144                             | KDN $\alpha$ -6Gal $\beta$ -Cer36                                                                        | -             | 1,230   |
| 16       | GSC-13                              | NeuAc $\alpha$ -(S)-6Gal $\beta$ -Cer36                                                                  | -             | 1,041   |
| 17       | GSC-72                              | NeuAc $\alpha$ -(S)-6Gal $\beta$ -(S)-Cer36                                                              | 282           | 1,360   |
| 18       | GSC-231                             | NeuAc $\alpha$ -8NeuAc $\alpha$ -6Gal $\beta$ -Cer36                                                     | -             | 445     |
| 19       | GSC-439                             | NeuAc $\alpha$ -8NeuAc $\alpha$ -8NeuAc $\alpha$ -6Gal $\beta$ -Cer36                                    | 93            | 1,027   |
| 20       | Glucocerebrosides                   | Glc $\beta$ -Cer?                                                                                        | -             | 1,469   |
| 21       | GSF-19                              | SU-6Glc $\beta$ -C30                                                                                     | 2,160         | 2,680   |
| 22       | GSC-60                              | NeuAc $\alpha$ -6Glc $\beta$ -Cer36                                                                      | -             | 1,898   |
| 23       | GSC-9                               | NeuAc $\alpha$ -(S)-6Glc $\beta$ -Cer36                                                                  | 160           | 1,611   |
| 24       | GSC-62                              | NeuAc $\alpha$ -2Glc $\beta$ -Cer36                                                                      | 132           | 1,248   |
| 25       | GSC-59                              | NeuAc $\alpha$ -6GlcNAc $\beta$ -Cer36                                                                   | 390           | 1,858   |
| 26       | GSC-95                              | NeuAc $\alpha$ -(S)-6GlcNAc $\beta$ -Cer36                                                               | -             | 1,626   |
| 27       | GSC-232                             | NeuAc $\alpha$ -8NeuAc $\alpha$ -6Glc $\beta$ -Cer36                                                     | -             | 1,001   |
| 28       | Lactocerebrosides                   | Gal $\beta$ -4Glc $\beta$ -Cer                                                                           | -             | 983     |
| 29       | Lac                                 | Gal $\beta$ -4Glc-DH                                                                                     | -             | 1,760   |
| 30       | Lac-AO                              | Gal $\beta$ -4Glc-AO                                                                                     | 1,219         | 3,863   |
| 31       | GSC-432                             | 3-deoxy, 3-carboxymethyl-Gal $\beta$ -4Glc $\beta$ -C30                                                  | 551           | 2,265   |
| 32       | GSC-296                             | GlcA $\beta$ -3Gal $\beta$ -4Glc $\beta$ -C30                                                            | -             | 962     |
| 33       | GSC-353                             | SU-3GlcA $\beta$ -3Gal $\beta$ -4Glc $\beta$ -C30                                                        | 350           | -       |
| 34       | GalNAc $\alpha$ -3Gal $\beta$ -4Glc | GalNAc $\alpha$ -3Gal $\beta$ -4Glc-DH                                                                   | -             | 1,427   |
| 35       | Globotri-AO                         | Gal $\alpha$ -4Gal $\beta$ -4Glc $\beta$ -AO                                                             | 456           | 2,521   |
| 36       | Ceramide trihexoside                | Gal $\alpha$ -4Gal $\beta$ -4Glc $\beta$ -Cer                                                            | 145           | 1,852   |
| 37       | Globoside (P-antigen)               | GalNAc $\beta$ -3Gal $\alpha$ -4Gal $\beta$ -4Glc $\beta$ -Cer                                           | -             | 1,269   |
| 38       | Forssmann glycolipid                | GalNAc $\alpha$ -3GalNAc $\beta$ -3Gal $\alpha$ -4Gal $\beta$ -4Glc $\beta$ -Cer<br>Gal $\beta$ -4Glc-AO | -             | 908     |
| 39       | Fuc(3)-Lac-AO                       | Fuca-3<br>3-deoxy, 3-carboxymethyl-Gal $\beta$ -3Glc $\beta$ -C30                                        | 563           | 2,851   |
| 40       | GSC-430                             | Fuca-4<br>3-deoxy, 3-carboxymethyl-Gal $\beta$ -4Glc $\beta$ -C30                                        | 2             | 1,106   |
| 41       | GSC-260                             | Fuca-3<br>SU-3Gal $\beta$ -4Glc $\beta$ -C30                                                             | 631           | 3,929   |
| 42       | GSC-150                             | Fuca-3<br>SU-3Gal $\beta$ -4Glc $\beta$ -Cer36                                                           | 287           | 473     |
| 43       | GSC-160                             | Fuca-3                                                                                                   | -             | 1,548   |
| 44       | NeuAc $\alpha$ -(3')Lac             | NeuAc $\alpha$ -3Gal $\beta$ -4Glc-DH                                                                    | 271           | 426     |
| 45       | NeuAc $\alpha$ -(3')Lac-AO          | NeuAc $\alpha$ -3Gal $\beta$ -4Glc-AO                                                                    | 546           | 1,565   |
| 46       | Neu4,5Ac-(3')Lac                    | 4O-AcNeuAc $\alpha$ -3Gal $\beta$ -4Glc-DH                                                               | -             | 636     |
| 47       | Neu4,5Ac-(3')Lac-AO                 | 4O-AcNeuAc $\alpha$ -3Gal $\beta$ -4Glc-AO                                                               | 312           | 1,005   |
| 48       | GSC-16                              | NeuAc $\alpha$ -3Gal $\beta$ -4Glc $\beta$ -Cer32                                                        | -             | 1,387   |
| 49       | GSC-178                             | NeuAc $\alpha$ -3Gal $\beta$ -4Glc $\beta$ -Cer34                                                        | -             | 1,033   |
| 50       | GSC-17                              | NeuAc $\alpha$ -3Gal $\beta$ -4Glc $\beta$ -Cer36                                                        | -             | 1,184   |
| 51       | GSC-18                              | NeuAc $\alpha$ -3Gal $\beta$ -4Glc $\beta$ -Cer42                                                        | -             | 1,770   |
| 52       | GSC-197                             | KDN $\alpha$ -3Gal $\beta$ -4Glc $\beta$ -Cer28                                                          | 45            | 2,456   |
| 53       | GSC-199                             | KDN $\alpha$ -3Gal $\beta$ -4Glc $\beta$ -C30                                                            | 31            | 947     |
| 54       | GSC-198                             | KDN $\alpha$ -3Gal $\beta$ -4Glc $\beta$ -Cer34                                                          | -             | 2,024   |
| 55       | GSC-75                              | (4-deoxy) NeuAc $\alpha$ -3Gal $\beta$ -4Glc $\beta$ -Cer36                                              | 228           | 1,676   |
| 56       | GSC-76                              | (7-deoxy) NeuAc $\alpha$ -3Gal $\beta$ -4Glc $\beta$ -Cer36                                              | -             | 136     |
| 57       | GSC-77                              | (8-deoxy) NeuAc $\alpha$ -3Gal $\beta$ -4Glc $\beta$ -Cer36                                              | -             | 1,489   |
| 58       | GSC-153                             | (4, 8-deoxy) NeuAc $\alpha$ -3Gal $\beta$ -4Glc $\beta$ -Cer36                                           | -             | 1,568   |
| 59       | GSC-51                              | (9-deoxy) NeuAc $\alpha$ -3Gal $\beta$ -4Glc $\beta$ -Cer36                                              | 60            | 1,335   |
| 60       | GSC-78                              | (4-OMe) NeuAc $\alpha$ -3Gal $\beta$ -4Glc $\beta$ -Cer36                                                | -             | 2,434   |
| 61       | GSC-79                              | (9-OMe) NeuAc $\alpha$ -3Gal $\beta$ -4Glc $\beta$ -Cer36                                                | -             | 1,394   |
| 62       | GSC-23                              | (C7) NeuAc $\alpha$ -3Gal $\beta$ -4Glc $\beta$ -Cer36                                                   | -             | 649     |
| 63       | GSC-24                              | (C8) NeuAc $\alpha$ -3Gal $\beta$ -4Glc $\beta$ -Cer36                                                   | -             | 624     |
| 64       | GSC-50                              | (C8 diastereoisomer) NeuAc $\alpha$ -3Gal $\beta$ -4Glc $\beta$ -Cer36                                   | -             | 1,555   |
| 65       | GSC-229                             | NeuAc $\alpha$ -8NeuAc $\alpha$ -3Gal $\beta$ -4Glc $\beta$ -Cer36                                       | -             | 506     |
| 66       | GSC-96                              | NeuAc $\alpha$ -9NeuAc $\alpha$ -3Gal $\beta$ -4Glc $\beta$ -Cer36                                       | -             | 197     |
| 67       | GSC-437                             | NeuAc $\alpha$ -8NeuAc $\alpha$ -8NeuAc $\alpha$ -3Gal $\beta$ -4Glc $\beta$ -Cer36                      | -             | 929     |

|     |                     |                                                                        |       |       |
|-----|---------------------|------------------------------------------------------------------------|-------|-------|
| 68  | Neuα-(3')Lac        | Neuα-3GalB-4Glc-DH                                                     | -     | 1,171 |
| 69  | Neuα-(3')Lac-AO     | Neuα-3GalB-4Glc-AO                                                     | 427   | 1,733 |
| 70  | NeuAcα-(6')Lac      | NeuAcα-6GalB-4Glc-DH                                                   | -     | 781   |
| 71  | NeuAcα-(6')Lac-AO   | NeuAcα-6GalB-4Glc-AO                                                   | 243   | 1,637 |
| 72  | GSC-61              | NeuAcα-6GalB-4GlcB-Cer36                                               | 98    | 1,317 |
| 73  | GSC-12              | NeuAcα-(S)-6GalB-4GlcB-Cer36                                           | -     | 1,961 |
| 74  | GSC-234             | NeuAcα-(S)-6Gal(S)β-4GlcB-Cer36                                        | -     | 1,420 |
| 75  | GSC-73              | NeuAcα-(S)-6Galβ-4Glcβ-(S)-Cer36                                       | 145   | 1,646 |
| 76  | Neuα-(6')Lac        | Neuα-6GalB-4Glc-DH                                                     | 162   | 931   |
| 77  | Neuα-(6')Lac-AO     | Neuα-6GalB-4Glc-AO                                                     | 446   | 2,229 |
| 78  | NeuAcβ-(3')Lac      | NeuAcβ-3GalB-4Glc-DH                                                   | -     | 421   |
| 79  | NeuAcβ-(3')Lac-AO   | NeuAcβ-3GalB-4Glc-AO                                                   | 46    | 1,052 |
| 80  | NeuAcβ-(6')Lac      | NeuAcβ-6GalB-4Glc-DH                                                   | 89    | 1,100 |
| 81  | NeuAcβ-(6')Lac-AO   | NeuAcβ-6GalB-4Glc-AO                                                   | 296   | 1,490 |
| 82  | GSC-161             | NeuAcα-3GalB-4GlcB-C30<br>↓<br>Fuca-3                                  | -     | -     |
| 83  | GSC-162             | NeuAcα-3GalB-4GlcB-Cer36<br>↓<br>Fuca-3                                | -     | 539   |
| 84  | LacNAc(1-3)         | GalB-3GlcNAc-DH                                                        | 277   | 2,081 |
| 85  | LacNAc(1-3)-AO      | GalB-3GlcNAc-AO                                                        | 2,353 | 1,821 |
| 86  | LacNAc              | GalB-4GlcNAc-DH                                                        | 420   | 1,953 |
| 87  | LacNAc-AO           | GalB-4GlcNAc-AO                                                        | 1,818 | 3,161 |
| 88  | Galα-4Galβ-4GlcNAc  | Galα-4GalB-4GlcNAc-DH                                                  | -     | 2,004 |
| 89  | SU(3')-LN           | SU-3GalB-4GlcNAc-DH<br>GalB-3GlcNAc-DH<br>↓<br>Fuca-4                  | 67    | 1,684 |
| 90  | Lea-Tri             | GalB-3GlcNAc-AO<br>↓<br>Fuca-4                                         | 116   | 1,528 |
| 91  | Lea-Tri-AO          | GalB-3GlcNAc-AO<br>↓<br>Fuca-4                                         | 356   | 1,465 |
| 92  | Lex-Tri             | GalB-4GlcNAc-DH<br>↓<br>Fuca-3                                         | 55    | 1,681 |
| 93  | Lex-Tri-AO          | GalB-4GlcNAc-AO<br>↓<br>Fuca-3                                         | 1,652 | 3,169 |
| 94  | Lex-Tri-(Me)AO      | GalB-4GlcNAc-(Me)AO<br>↓<br>Fuca-3                                     | 146   | 1,589 |
| 95  | SU(3')-Lea-Tri      | SU-3GalB-3GlcNAc-DH<br>↓<br>Fuca-4                                     | -     | 1,442 |
| 96  | SU(3')-Lex-Tri      | SU-3GalB-4GlcNAc-DH<br>↓<br>Fuca-3                                     | -     | 1,020 |
| 97  | NeuAcα-(3')LN1-3    | NeuAcα-3GalB-3GlcNAc-DH                                                | -     | 580   |
| 98  | NeuAcα-(3')LN1-3-AO | NeuAcα-3GalB-3GlcNAc-AO                                                | 503   | -     |
| 99  | NeuAcα-(3')LN       | NeuAcα-3GalB-4GlcNAc-DH                                                | -     | 728   |
| 100 | NeuAcα-(3')LN-AO    | NeuAcα-3GalB-4GlcNAc-AO                                                | 43    | 639   |
| 101 | PI-1                | NeuAcα-3(6-NAc)GalB-4GlcNAc-DH                                         | -     | -     |
| 102 | PI-1-AO             | NeuAcα-3(6-NAc)GalB-4GlcNAc-AO                                         | -     | 445   |
| 103 | PI-2                | NeuAcα-3(6-NBz)GalB-4GlcNAc-DH                                         | -     | 399   |
| 104 | PI-2-AO             | NeuAcα-3(6-NBz)GalB-4GlcNAc-AO                                         | 167   | 505   |
| 105 | NeuAcα-(6')LN       | NeuAcα-6GalB-4GlcNAc-DH                                                | 44    | 1,069 |
| 106 | NeuAcα-(6')LN-AO    | NeuAcα-6GalB-4GlcNAc-AO                                                | -     | 1,186 |
| 107 | Neu5,9Ac-(6')LN     | 9O-AcNeuAcα-6GalB-4GlcNAc-DH<br>NeuAcα-3GalB-3GlcNAc-DH<br>↓<br>Fuca-4 | -     | -     |
| 108 | SA(3')-Lea-Tri      | NeuAcα-3GalB-3GlcNAc-AO<br>↓<br>Fuca-4                                 | -     | 201   |
| 109 | SA(3')-Lea-Tri-AO   | NeuAcα-3GalB-3GlcNAc-AO<br>↓<br>Fuca-4                                 | 37    | 772   |
| 110 | SA(3')-Lex-Tri      | NeuAcα-3GalB-4GlcNAc-DH<br>↓<br>Fuca-3                                 | -     | 137   |
| 111 | SA(3')-Lex-Tri-AO   | NeuAcα-3GalB-4GlcNAc-AO<br>↓<br>Fuca-3                                 | -     | 889   |
| 112 | GSC-440             | NeuAcα-3GalB-4GlcNAcB-C30<br>↓<br>Fuca-3                               | -     | 470   |
| 113 | GSC-512             | 4O-AcNeuAcα-3GalB-4GlcNAcB-C30<br>↓<br>Fuca-3                          | -     | 1,799 |
| 114 | GSC-513             | 9O-AcNeuAcα-3GalB-3GlcNAcB-C30<br>↓<br>Fuca-4                          | -     | 1,066 |
| 115 | GSC-511             | 9O-AcNeuAcα-3GalB-4GlcNAcB-C30<br>↓<br>Fuca-3                          | -     | 728   |
| 116 | GSC-225             | (3-carboxymethyl)GalB-4GlcNAcB-3GalB-Cer36<br>↓<br>Fuca-3              | 205   | 1,480 |
| 117 | GSC-236             | 3SU<br>↓<br>GalB-4GlcNAcB-3GalB-C30<br>↓<br>Fuca-3                     | -     | 1,264 |
| 118 | GSC-479             | NeuAcα-3GalB-4GlcNAcB-3GalB-C30<br>↓<br>Fuca-3                         | -     | 835   |
| 119 | GSC-105             | NeuAcα-3GalB-4GlcNAcB-3GalB-Cer36<br>↓<br>Fuca-3                       | -     | 1,308 |
| 120 | GSC-121             | NeuAcα-3GalB-4GlcNAcB-3GalB-Cer36<br>↓<br>(3-deoxy)Fuca-3              | -     | 1,261 |
| 121 | GSC-123             | NeuAcα-3GalB-4GlcNAcB-3GalB-Cer36<br>↓<br>(4-deoxy)Fuca-3              | -     | 885   |
| 122 | GSC-133             | NeuAcα-3GalB-4GlcNAcB-3GalB-Cer36<br>↓<br>(2-OMe)Fuca-3                | -     | 796   |

|     |                          |                                                                                                                                                             |     |       |
|-----|--------------------------|-------------------------------------------------------------------------------------------------------------------------------------------------------------|-----|-------|
| 123 | GSC-131                  | NeuAc $\alpha$ -3Gal $\beta$ -4GlcNAc $\beta$ -3Gal $\beta$ -Cer36<br> <br>Quva-3                                                                           | -   | 719   |
| 124 | GSC-163                  | NeuAc $\alpha$ -3Gal $\beta$ -4GlcNAc $\beta$ -3Gal $\beta$ -Cer36<br> <br>Rha $\alpha$ -3                                                                  | -   | 946   |
| 125 | GSC-127                  | NeuAc $\alpha$ -3Gal $\beta$ -4GlcNAc $\beta$ -3Gal $\beta$ -Cer36<br> <br>(6-deoxy) L-Tal $\alpha$ -3                                                      | -   | 1,534 |
| 126 | GSC-341                  | KDN $\alpha$ -3Gal $\beta$ -4GlcNAc $\beta$ -3Gal $\beta$ -C30<br> <br>Fuca-3                                                                               | -   | 651   |
| 127 | GSC-177                  | NeuGc $\alpha$ -3Gal $\beta$ -4GlcNAc $\beta$ -3Gal $\beta$ -Cer36<br> <br>Fuca-3                                                                           | -   | 616   |
| 128 | GSC-175                  | NeuAc $\alpha$ -3(4-deoxy) Gal $\beta$ -4GlcNAc $\beta$ -3Gal $\beta$ -Cer36<br> <br>Fuca-3                                                                 | -   | 951   |
| 129 | GSC-176                  | NeuAc $\alpha$ -3(6-deoxy) Gal $\beta$ -4GlcNAc $\beta$ -3Gal $\beta$ -Cer36<br> <br>Fuca-3                                                                 | -   | 873   |
| 130 | GSC-257                  | NeuAc $\alpha$ -3(4,6-deoxy) Gal $\beta$ -4GlcNAc $\beta$ -3Gal $\beta$ -Cer36<br> <br>Fuca-3                                                               | -   | 273   |
| 131 | DLNN                     | GlcNAc $\beta$ -3Gal $\beta$ -4Glc-DH                                                                                                                       | -   | 276   |
| 132 | LNT                      | Gal $\beta$ -3GlcNAc $\beta$ -3Gal $\beta$ -4Glc-DH                                                                                                         | -   | 1,234 |
| 133 | Paragloboside            | Gal $\beta$ -4GlcNAc $\beta$ -3Gal $\beta$ -4Glc $\beta$ -Cer                                                                                               | 508 | 1,881 |
| 134 | LNnT                     | Gal $\beta$ -4GlcNAc $\beta$ -3Gal $\beta$ -4Glc-DH                                                                                                         | -   | 1,830 |
| 135 | B-like pentaosylceramide | Gal $\alpha$ -3Gal $\beta$ -4GlcNAc $\beta$ -3Gal $\beta$ -4Glc $\beta$ -Cer                                                                                | 316 | 1,373 |
| 136 | Klaus glycolipid         | Gal $\beta$ -3Gal $\beta$ -4GlcNAc $\beta$ -3Gal $\beta$ -4Glc $\beta$ -Cer                                                                                 | 303 | 2,565 |
| 137 | GSC-207                  | GlcA $\beta$ -3Gal $\beta$ -4GlcNAc $\beta$ -3Gal $\beta$ -4Glc $\beta$ -C30                                                                                | -   | 1,171 |
| 138 | GSC-191                  | GlcA $\beta$ -3Gal $\beta$ -4GlcNAc $\beta$ -3Gal $\beta$ -4Glc $\beta$ -Cer36                                                                              | -   | 1,382 |
| 139 | GSC-189                  | GlcA $\beta$ -3Gal $\beta$ -4GlcNAc $\beta$ -3Gal $\beta$ -4Glc $\beta$ -Cer42                                                                              | -   | 1,795 |
| 140 | SU(3')-Tri               | SU-3Gal $\beta$ -4GlcNAc $\beta$ -3Gal-DH                                                                                                                   | 277 | 1,210 |
| 141 | GSC-208                  | SU-3GlcA $\beta$ -3Gal $\beta$ -4GlcNAc $\beta$ -3Gal $\beta$ -4Glc $\beta$ -C30                                                                            | -   | 964   |
| 142 | GSC-192                  | SU-3GlcA $\beta$ -3Gal $\beta$ -4GlcNAc $\beta$ -3Gal $\beta$ -4Glc $\beta$ -Cer36                                                                          | 8   | -     |
| 143 | GSC-190                  | SU-3GlcA $\beta$ -3Gal $\beta$ -4GlcNAc $\beta$ -3Gal $\beta$ -4Glc $\beta$ -Cer42                                                                          | -   | 1,230 |
| 144 | Led-II pentaosylceramide | Fuca-2Gal $\beta$ -3GlcNAc $\beta$ -3Gal $\beta$ -4Glc $\beta$ -CerA                                                                                        | 94  | 1,763 |
| 145 | Led-I pentaosylceramide  | Fuca-2Gal $\beta$ -3GlcNAc $\beta$ -3Gal $\beta$ -4Glc $\beta$ -CerB                                                                                        | -   | 889   |
| 146 | LNFP-I                   | Fuca-2Gal $\beta$ -3GlcNAc $\beta$ -3Gal $\beta$ -4Glc-DH                                                                                                   | -   | 1,276 |
| 147 | B-hexaosylceramide       | Gal $\alpha$ -3Gal $\beta$ -4GlcNAc $\beta$ -3Gal $\beta$ -4Glc $\beta$ -Cer<br> <br>Fuca-2                                                                 | 188 | 1,829 |
| 148 | A-Hexa                   | GalNAc $\alpha$ -3Gal $\beta$ -3GlcNAc $\beta$ -3Gal $\beta$ -4Glc-DH<br> <br>Fuca-2                                                                        | -   | 1,153 |
| 149 | A-Hepta                  | GalNAc $\alpha$ -3Gal $\beta$ -3GlcNAc $\beta$ -3Gal $\beta$ -4Glc-DH<br> <br>Fuca-2<br> <br>Fuca-4                                                         | -   | 1,712 |
| 150 | LNFP-II                  | Gal $\beta$ -3GlcNAc $\beta$ -3Gal $\beta$ -4Glc-DH<br> <br>Fuca-4                                                                                          | -   | 504   |
| 151 | LNDFH-II                 | Gal $\beta$ -3GlcNAc $\beta$ -3Gal $\beta$ -4Glc-DH<br> <br>Fuca-4<br> <br>Fuca-3                                                                           | -   | 1,055 |
| 152 | Leb-hexaosylceramide     | Fuca-2Gal $\beta$ -3GlcNAc $\beta$ -3Gal $\beta$ -4Glc $\beta$ -Cer<br> <br>Fuca-4                                                                          | -   | 507   |
| 153 | LNDFH-I                  | Fuca-2Gal $\beta$ -3GlcNAc $\beta$ -3Gal $\beta$ -4Glc-DH<br> <br>Fuca-4                                                                                    | -   | 310   |
| 154 | LNTFH-I                  | Fuca-2Gal $\beta$ -3GlcNAc $\beta$ -3Gal $\beta$ -4Glc-DH<br> <br>Fuca-4<br> <br>Fuca-2                                                                     | -   | 716   |
| 155 | LNFP-III                 | Gal $\beta$ -4GlcNAc $\beta$ -3Gal $\beta$ -4Glc-DH<br> <br>Fuca-3                                                                                          | -   | 1,085 |
| 156 | LNFP-III-AO              | Gal $\beta$ -4GlcNAc $\beta$ -3Gal $\beta$ -4Glc-AO<br> <br>Fuca-3                                                                                          | 623 | 2,746 |
| 157 | LNnDFH-I                 | Fuca-2Gal $\beta$ -4GlcNAc $\beta$ -3Gal $\beta$ -4Glc-DH<br> <br>Fuca-3                                                                                    | -   | 548   |
| 158 | LNnDFH-II                | Gal $\beta$ -4GlcNAc $\beta$ -3Gal $\beta$ -4Glc-DH<br> <br>Fuca-3<br> <br>Fuca-3                                                                           | -   | 1,167 |
| 159 | LNnDFH-V                 | Gal $\beta$ -4GlcNAc $\beta$ -3Gal $\beta$ -4Glc-DH<br> <br>Fuca-3<br> <br>Fuca-2                                                                           | -   | 66    |
| 160 | LNnTFH-I                 | Fuca-2Gal $\beta$ -4GlcNAc $\beta$ -3Gal $\beta$ -4Glc-DH<br> <br>Fuca-3<br> <br>Fuca-2                                                                     | -   | 670   |
| 161 | SU(3')-LNFP-II           | SU-3Gal $\beta$ -3GlcNAc $\beta$ -4Gal $\beta$ -4Glc-DH<br> <br>Fuca-4                                                                                      | -   | 670   |
| 162 | SU(6')-LNFP-II           | SU-6Gal $\beta$ -3GlcNAc $\beta$ -3Gal $\beta$ -4Glc-DH<br> <br>Fuca-4                                                                                      | -   | -     |
| 163 | SU(3')-LNFP-III          | SU-3Gal $\beta$ -4GlcNAc $\beta$ -3Gal $\beta$ -4Glc-DH<br> <br>Fuca-3                                                                                      | -   | 221   |
| 164 | SU(6')-LNFP-III          | SU-6Gal $\beta$ -4GlcNAc $\beta$ -3Gal $\beta$ -4Glc-DH<br> <br>Fuca-3                                                                                      | -   | 106   |
| 165 | SU(3',6)-LNFP-III        | SU-6<br> <br>SU-3Gal $\beta$ -4GlcNAc $\beta$ -3Gal $\beta$ -4Glc-DH<br> <br>Fuca-3                                                                         | 114 | -     |
| 166 | LSTa                     | NeuAc $\alpha$ -3Gal $\beta$ -3GlcNAc $\beta$ -3Gal $\beta$ -4Glc-DH                                                                                        | -   | 435   |
| 167 | GSC-272                  | NeuAc $\alpha$ -3Gal $\beta$ -3GlcNAc $\beta$ -3Gal $\beta$ -4Glc $\beta$ -C30                                                                              | -   | -     |
| 168 | GSC-147                  | KDN $\alpha$ -3Gal $\beta$ -3GlcNAc $\beta$ -3Gal $\beta$ -4Glc $\beta$ -Cer36                                                                              | -   | -     |
| 169 | GSC-396                  | NeuGc $\alpha$ -3Gal $\beta$ -3GlcNAc $\beta$ -3Gal $\beta$ -4Glc $\beta$ -C30<br> <br>Gal $\beta$ -3GlcNAc $\beta$ -3Gal $\beta$ -4Glc-DH                  | -   | 625   |
| 170 | LSTb                     | NeuAc $\alpha$ -6                                                                                                                                           | -   | 226   |
| 171 | GSC-397                  | NeuGc $\alpha$ -6Gal $\beta$ -3GlcNAc $\beta$ -3Gal $\beta$ -4Glc $\beta$ -C30<br> <br>NeuAc $\alpha$ -3Gal $\beta$ -3GlcNAc $\beta$ -3Gal $\beta$ -4Glc-DH | -   | 887   |
| 172 | DSLNT                    | NeuAc $\alpha$ -6                                                                                                                                           | -   | 236   |
| 173 | Sialylparagloboside      | NeuAc $\alpha$ -3Gal $\beta$ -4GlcNAc $\beta$ -3Gal $\beta$ -4Glc $\beta$ -Cer                                                                              | 81  | 943   |

|     |                        |                                                                                                                                           |     |       |
|-----|------------------------|-------------------------------------------------------------------------------------------------------------------------------------------|-----|-------|
| 174 | GSC-273                | NeuAcα-3Galβ-4GlcNAcβ-3Galβ-4Glc β-C30                                                                                                    | -   | -     |
| 175 | GSC-31                 | NeuAcα-3Galβ-4GlcNAcβ-3Galβ-4Glcβ-Cer36                                                                                                   | -   | 1,154 |
| 176 | LSTc                   | NeuAcα-6Galβ-4GlcNAcβ-3Galβ-4Glc-DH                                                                                                       | -   | 908   |
| 177 | GSC-516B               | Neuα-3Galβ-4GlcNAcβ-3Galβ-4Glcβ-Cer36<br>SU-6                                                                                             | 141 | 1,993 |
| 178 | SA(3/6)LNFP-I          | NeuAcα-3/6Galβ-3GlcNAcβ-3Galβ-4Glc-DH<br>Fuca-2                                                                                           | 145 | 925   |
| 179 | SA(3')-LNFP-II         | NeuAcα-3Galβ-3GlcNAcβ-3Galβ-4Glc-DH<br>Fuca-4                                                                                             | -   | 492   |
| 180 | SA(6')-LNFP-VI         | NeuAcα-6Galβ-4GlcNAcβ-3Galβ-4Glc-DH<br>Fuca-3                                                                                             | -   | 685   |
| 181 | GSC-533                | NeuAcα-3Galβ-4GlcNAcβ-3Galβ-4Glcβ-Cer36<br>Fuca-3                                                                                         | -   | 1,500 |
| 182 | GSC-64                 | NeuAcα-3Galβ-4GlcNAcβ-3Galβ-4Glcβ-Cer36<br>Fuca-3                                                                                         | -   | 1,492 |
| 183 | SA(3')-LNFP-III        | NeuAcα-3Galβ-4GlcNAcβ-3Galβ-4Glc-DH<br>Fuca-3                                                                                             | -   | 879   |
| 184 | GSC-472                | Neuα-3Galβ-4GlcNAcβ-3Galβ-4Glcβ-Cer36<br>Fuca-3                                                                                           | -   | 1,527 |
| 185 | GSC-97                 | NeuAcα-6Galβ-4GlcNAcβ-3Galβ-4Glcβ-Cer36<br>Fuca-3                                                                                         | -   | 914   |
| 186 | GSC-314                | KDNα-3Galβ-4GlcNAcβ-3Galβ-4Glcβ-C30<br>Fuca-3                                                                                             | -   | -     |
| 187 | GSC-149                | KDNα-3Galβ-4GlcNAcβ-3Galβ-4Glc β-Cer36<br>Fuca-3                                                                                          | -   | 721   |
| 188 | GSC-311                | KDNα-3Galβ-4GlcNAcβ-3Galβ-4Glcβ-C30<br>Rhaα-3                                                                                             | -   | 233   |
| 189 | GSC-268                | SU-6<br>NeuAcα-3Galβ-4GlcNAcβ-3Galβ-4Glcβ-Cer36<br>Fuca-3                                                                                 | -   | 652   |
| 190 | GSC-268 deNAc          | SU-6<br>Neuα-3Galβ-4GlcNAcβ-3Galβ-4Glcβ-Cer36<br>Fuca-3                                                                                   | -   | 651   |
| 191 | GSC-269                | SU-6<br>NeuAcα-3Galβ-4GlcNAcβ-3Galβ-4Glcβ-Cer36<br>Fuca-3                                                                                 | -   | 522   |
| 192 | GSC-406                | SU-6<br>Neuα-3Galβ-4GlcNAcβ-3Galβ-4Glcβ-Cer36<br>Fuca-3                                                                                   | 110 | 1,611 |
| 193 | GSC-270                | SU-6 SU-6<br>NeuAcα-3Galβ-4GlcNAcβ-3Galβ-4Glcβ-Cer36<br>Fuca-3                                                                            | -   | 1,041 |
| 194 | pLNH                   | Galβ-3GlcNAcβ-3Galβ-4GlcNAcβ-3Galβ-4Glc-DH                                                                                                | -   | -     |
| 195 | pLNnH                  | Galβ-4GlcNAcβ-3Galβ-4GlcNAcβ-3Galβ-4Glc-DH                                                                                                | -   | 1,529 |
| 196 | GSC-216                | GlcAβ-3Galβ-4GlcNAcβ-3Galβ-4GlcNAcβ-3Galβ-4Glcβ-Cer42                                                                                     | -   | 1,101 |
| 197 | GSC-217                | SU-3GlcAβ-3Galβ-4GlcNAcβ-3Galβ-4GlcNAcβ-3Galβ-4Glcβ-Cer42                                                                                 | -   | -     |
| 198 | GSC-218                | GlcAβ-3Galβ-4GlcNAcβ-3Galβ-4GlcNAcβ-3Galβ-4Glcβ-Cer36                                                                                     | 2   | 875   |
| 199 | GSC-219                | SU-3GlcAβ-3Galβ-4GlcNAcβ-3Galβ-4GlcNAcβ-3Galβ-4Glcβ-Cer36                                                                                 | 119 | 1,270 |
| 200 | LNH                    | Galβ-4GlcNAcβ-6<br>Galβ-4Glc-DH<br>Galβ-3GlcNAcβ-3                                                                                        | 201 | 285   |
| 201 | iLNO                   | Galβ-3GlcNAcβ-3Galβ-4GlcNAcβ-6<br>Galβ-4Glc-DH<br>Galβ-3GlcNAcβ-3                                                                         | -   | 532   |
| 202 | LND                    | Galβ-4GlcNAcβ-6<br>Galβ-4GlcNAcβ-6<br>Galβ-3GlcNAcβ-3 Galβ-4Glc-DH<br>Galβ-3GlcNAcβ-3                                                     | -   | -     |
| 203 | LNnH                   | Galβ-4GlcNAcβ-6<br>Galβ-4Glc-DH<br>Galβ-4GlcNAcβ-3                                                                                        | -   | 501   |
| 204 | Nonaosylceramide       | GlcNAcβ-6<br>GlcNAcβ-6 Galβ-4GlcNAcβ-3Galβ-4Glcβ-Cer<br>Galβ-4GlcNAcβ-3<br>GlcNAcβ-3                                                      | -   | 510   |
| 205 | l-octaosylceramide     | Galβ-4GlcNAcβ-6<br>Galβ-4GlcNAcβ-3Galβ-4Glcβ-Cer<br>Galβ-4GlcNAcβ-3                                                                       | -   | 818   |
| 206 | l-dodecaosylceramide   | Galβ-4GlcNAcβ-6<br>Galβ-4GlcNAcβ-6 Galβ-4GlcNAcβ-3Galβ-4Glcβ-Cer<br>Galβ-4GlcNAcβ-3<br>Galβ-4GlcNAcβ-3                                    | 37  | 1,051 |
| 207 | l-hexadecaosylceramide | Galβ-4GlcNAcβ-6<br>Galβ-4GlcNAcβ-6 Galβ-4GlcNAcβ-3Galβ-4Glcβ-Cer<br>Galβ-4GlcNAcβ-6 Galβ-4GlcNAcβ-3<br>Galβ-4GlcNAcβ-6<br>Galβ-4GlcNAcβ-3 | -   | 311   |

|     |                               |                                                                                                                                                                                                                                                                                                                                                                                                                                                |     |       |
|-----|-------------------------------|------------------------------------------------------------------------------------------------------------------------------------------------------------------------------------------------------------------------------------------------------------------------------------------------------------------------------------------------------------------------------------------------------------------------------------------------|-----|-------|
| 208 | I-eicosaosylceramide          | <pre>           GalB-4GlcNAcB-6                 GalB-4GlcNAcB-6  GalB-4GlcNAcB-6  GalB-4GlcNAcB-3GalB-4GlcB-Cer                                         GalB-4GlcNAcB-6  GalB-4GlcNAcB-6  GalB-4GlcNAcB-3                                         GalB-4GlcNAcB-6  GalB-4GlcNAcB-6  GalB-4GlcNAcB-3                                         GalB-4GlcNAcB-3  GalB-4GlcNAcB-3  GalB-4GlcNAcB-3                 GalB-4GlcNAcB-3           </pre> | -   | 501   |
| 209 | B-like decaosylceramide       | <pre>           GalB-4GlcNAcB-6                 GalB-4GlcNAcB-3GalB-4GlcB-Cer                 GalB-4GlcNAcB-3           </pre>                                                                                                                                                                                                                                                                                                                 | -   | 1,248 |
| 210 | B-like pentadecaosylceramide  | <pre>           GalB-4GlcNAcB-6                 GalB-4GlcNAcB-3GalB-4GlcB-Cer                 GalB-4GlcNAcB-3           </pre>                                                                                                                                                                                                                                                                                                                 | -   | 1,148 |
| 211 | B-like eicosaosylceramide     | <pre>           GalB-4GlcNAcB-6                 GalB-4GlcNAcB-3GalB-4GlcB-Cer                 GalB-4GlcNAcB-3           </pre>                                                                                                                                                                                                                                                                                                                 | 134 | 1,441 |
| 212 | B-like pentaieicososylceramid | <pre>           GalB-4GlcNAcB-6                 GalB-4GlcNAcB-6  GalB-4GlcNAcB-3GalB-4GlcB-Cer                                         GalB-4GlcNAcB-6  GalB-4GlcNAcB-6  GalB-4GlcNAcB-3                                         GalB-4GlcNAcB-6  GalB-4GlcNAcB-6  GalB-4GlcNAcB-3                                         GalB-4GlcNAcB-3  GalB-4GlcNAcB-3  GalB-4GlcNAcB-3                 GalB-4GlcNAcB-3           </pre>                  | 158 | 807   |
| 213 | pLNH-IV                       | <pre>           GalB-4GlcNAcB-6                 GalB-3GlcNAcB-3GalB-4GlcNAcB-3GalB-4Glc-DH                 Fuca-3           </pre>                                                                                                                                                                                                                                                                                                             | -   | 743   |
| 214 | DFpLNH-II                     | <pre>           GalB-3GlcNAcB-3GalB-4GlcNAcB-3GalB-4Glc-DH                             Fuca-4         Fuca-3           </pre>                                                                                                                                                                                                                                                                                                                  | -   | 151   |
| 215 | TFpLNH-I                      | <pre>           Fuca-2GalB-3GlcNAcB-3GalB-4GlcNAcB-3GalB-4Glc-DH                             Fuca-4         Fuca-3           </pre>                                                                                                                                                                                                                                                                                                            | -   | 687   |
| 216 | MFLNH-III                     | <pre>           GalB-4GlcNAcB-6                 Fuca-3  GalB-4Glc-DH                 GalB-3GlcNAcB-3           </pre>                                                                                                                                                                                                                                                                                                                          | -   | -     |
| 217 | DFLNH(b)                      | <pre>           GalB-4GlcNAcB-6                 Fuca-3  GalB-4Glc-DH                 GalB-3GlcNAcB-3                 Fuca-4           </pre>                                                                                                                                                                                                                                                                                                   | -   | 1,203 |
| 218 | DFLNH(c)                      | <pre>           GalB-4GlcNAcB-6                 GalB-4Glc-DH                 Fuca-2GalB-3GlcNAcB-3                 Fuca-4           </pre>                                                                                                                                                                                                                                                                                                     | -   | 875   |
| 219 | DFLNH(a)                      | <pre>           GalB-4GlcNAcB-6                 Fuca-3  GalB-4Glc-DH                 Fuca-2GalB-3GlcNAcB-3           </pre>                                                                                                                                                                                                                                                                                                                    | -   | 145   |
| 220 | TFLNH                         | <pre>           GalB-4GlcNAcB-6                 Fuca-3  GalB-4Glc-DH                 Fuca-2GalB-3GlcNAcB-3                 Fuca-4           </pre>                                                                                                                                                                                                                                                                                             | -   | 816   |
| 221 | MFiLNO-IV                     | <pre>           GalB-3GlcNAcB-3GalB-4GlcNAcB-6                             Fuca-3         GalB-4Glc-DH                 GalB-3GlcNAcB-3           </pre>                                                                                                                                                                                                                                                                                        | -   | 744   |
| 222 | TFiLNO                        | <pre>           GalB-3GlcNAcB-3GalB-4GlcNAcB-6                             Fuca-4         Fuca-3  GalB-4Glc-DH                             GalB-3GlcNAcB-3                 Fuca-4           </pre>                                                                                                                                                                                                                                             | -   | 657   |
| 223 | MFLND                         | <pre>           GalB-4GlcNAcB-6                 Fuca-3  GalB-4GlcNAcB-6                             GalB-3GlcNAcB-3  GalB-4Glc-DH                 GalB-3GlcNAcB-3           </pre>                                                                                                                                                                                                                                                             | -   | -     |
| 224 | MFLNnH(a)                     | <pre>           GalB-4GlcNAcB-6                 Fuca-3  GalB-4Glc-DH                 GalB-4GlcNAcB-3           </pre>                                                                                                                                                                                                                                                                                                                          | -   | 531   |
| 225 | DFLNnH                        | <pre>           GalB-4GlcNAcB-6                 Fuca-3  GalB-4Glc-DH                 GalB-4GlcNAcB-3                 Fuca-3           </pre>                                                                                                                                                                                                                                                                                                   | -   | 367   |
| 226 | B-III dodecaosylceramide      | <pre>           GalB-4GlcNAcB-6                 Fuca-2  GalB-4GlcNAcB-3GalB-4GlcB-Cer                             GalB-4GlcNAcB-3                 Fuca-2           </pre>                                                                                                                                                                                                                                                                      | -   | 447   |

|     |                               |                                                                                                                                                                                                                                                                                                                                                                                                                              |       |       |
|-----|-------------------------------|------------------------------------------------------------------------------------------------------------------------------------------------------------------------------------------------------------------------------------------------------------------------------------------------------------------------------------------------------------------------------------------------------------------------------|-------|-------|
| 227 | B-IV tetradecaosylceramide    | $\begin{array}{c} \text{Gal}\alpha\text{-3Gal}\beta\text{-4GlcNAc}\beta\text{-6} \\   \qquad \qquad \qquad   \\ \text{Fuca}\alpha\text{-2} \qquad \qquad \text{Gal}\beta\text{-4GlcNAc}\beta\text{-3Gal}\beta\text{-4Glc}\beta\text{-Cer} \\   \qquad \qquad \qquad   \\ \text{Gal}\alpha\text{-3Gal}\beta\text{-4GlcNAc}\beta\text{-3Gal}\beta\text{-4GlcNAc}\beta\text{-3} \\   \\ \text{Fuca}\alpha\text{-2} \end{array}$ | -     | 971   |
| 228 | MSLNH                         | $\begin{array}{c} \text{NeuAc}\alpha\text{-6Gal}\beta\text{-4GlcNAc}\beta\text{-6} \\   \\ \text{Gal}\beta\text{-4Glc}\text{-DH} \\   \\ \text{Gal}\beta\text{-3GlcNAc}\beta\text{-3} \\   \\ \text{Gal}\beta\text{-4GlcNAc}\beta\text{-6} \end{array}$                                                                                                                                                                      | -     | 371   |
| 229 | MSLNnH-I                      | $\begin{array}{c} \text{NeuAc}\alpha\text{-6Gal}\beta\text{-3GlcNAc}\beta\text{-3} \\   \\ \text{Gal}\beta\text{-4Glc}\text{-DH} \\   \\ \text{Gal}\beta\text{-4GlcNAc}\beta\text{-6} \end{array}$                                                                                                                                                                                                                           | -     | 591   |
| 230 | DSLNNH                        | $\begin{array}{c} \text{NeuAc}\alpha\text{-6Gal}\beta\text{-4GlcNAc}\beta\text{-6} \\   \\ \text{Gal}\beta\text{-4Glc}\text{-DH} \\   \\ \text{NeuAc}\alpha\text{-6Gal}\beta\text{-4GlcNAc}\beta\text{-3} \end{array}$                                                                                                                                                                                                       | -     | 817   |
| 231 | MSMFLNH                       | $\begin{array}{c} \text{Gal}\beta\text{-4GlcNAc}\beta\text{-6} \\   \qquad \qquad \qquad   \\ \text{Fuca}\alpha\text{-3} \qquad \qquad \text{Gal}\beta\text{-4Glc}\text{-DH} \\   \qquad \qquad \qquad   \\ \text{NeuAc}\alpha\text{-3Gal}\beta\text{-3GlcNAc}\beta\text{-3} \end{array}$                                                                                                                                    | -     | 436   |
| 232 | MFMSLNnH                      | $\begin{array}{c} \text{Gal}\beta\text{-4GlcNAc}\beta\text{-6} \\   \qquad \qquad \qquad   \\ \text{Fuca}\alpha\text{-3} \qquad \qquad \text{Gal}\beta\text{-4Glc}\text{-DH} \\   \qquad \qquad \qquad   \\ \text{NeuAc}\alpha\text{-6Gal}\beta\text{-3GlcNAc}\beta\text{-3} \end{array}$                                                                                                                                    | -     | 718   |
| 233 | GSC-221                       | $\begin{array}{c} \text{NeuAc}\alpha\text{-3Gal}\beta\text{-4GlcNAc}\beta\text{-3Gal}\beta\text{-4Glc}\beta\text{-Cer36} \\   \\ \text{Fuca}\alpha\text{-3} \end{array}$                                                                                                                                                                                                                                                     | -     | 726   |
| 234 | GSC-220                       | $\begin{array}{c} \text{NeuAc}\alpha\text{-3Gal}\beta\text{-4GlcNAc}\beta\text{-3Gal}\beta\text{-4Glc}\beta\text{-Cer36} \\   \qquad \qquad \qquad   \\ \text{Fuca}\alpha\text{-3} \qquad \qquad \text{Fuca}\alpha\text{-3} \end{array}$                                                                                                                                                                                     | -     | 999   |
| 235 | C4U                           | $\begin{array}{c} \text{NeuAc}\alpha\text{-3Gal}\beta\text{-4GlcNAc}\beta\text{-3Gal}\beta\text{-3GlcNAc}\text{-DH} \\   \qquad \qquad \qquad   \qquad \qquad \qquad   \\ \text{SU}\text{-6} \qquad \qquad \text{SU}\text{-6} \qquad \qquad \text{SU}\text{-6} \end{array}$                                                                                                                                                  | -     | 195   |
| 236 | Man2( $\alpha$ 2)             | Man $\alpha$ -2Man-DH                                                                                                                                                                                                                                                                                                                                                                                                        | 2,133 | 1,099 |
| 237 | Man2( $\alpha$ 3)             | Man $\alpha$ -3Man-DH                                                                                                                                                                                                                                                                                                                                                                                                        | 9,465 | 1,148 |
| 238 | Man2( $\alpha$ 6)             | Man $\alpha$ -6Man-DH                                                                                                                                                                                                                                                                                                                                                                                                        | 917   | 1,646 |
| 239 | Man3( $\alpha$ 3, $\alpha$ 6) | $\begin{array}{c} \text{Man}\alpha\text{-3} \\   \\ \text{Man}\alpha\text{-6Man}\text{-DH} \end{array}$                                                                                                                                                                                                                                                                                                                      | 4,146 | 1,619 |
| 240 | Man5( $\alpha$ 3, $\alpha$ 6) | $\begin{array}{c} \text{Man}\alpha\text{-3} \\   \\ \text{Man}\alpha\text{-6Man}\alpha\text{-6Man}\text{-DH} \end{array}$                                                                                                                                                                                                                                                                                                    | 4,931 | 439   |
| 241 | Man1GN1                       | Man $\beta$ -4GlcNAc-DH                                                                                                                                                                                                                                                                                                                                                                                                      | -     | 732   |
| 242 | Man2GN1                       | Man $\alpha$ -3Man $\beta$ -4GlcNAc-DH                                                                                                                                                                                                                                                                                                                                                                                       | 8,624 | 1,249 |
| 243 | Man2aGN2                      | Man $\alpha$ -6Man $\beta$ -4GlcNAc $\beta$ -4GlcNAc-DH                                                                                                                                                                                                                                                                                                                                                                      | 1,669 | 2,073 |
| 244 | Man3GN2                       | $\begin{array}{c} \text{Man}\alpha\text{-6} \\   \\ \text{Man}\beta\text{-4GlcNAc}\beta\text{-4GlcNAc}\text{-DH} \\   \\ \text{Man}\alpha\text{-3} \end{array}$                                                                                                                                                                                                                                                              | 4,255 | 3,503 |
| 245 | Man4aGN2                      | $\begin{array}{c} \text{Man}\alpha\text{-3Man}\alpha\text{-6} \\   \qquad \qquad \qquad   \\ \text{Man}\beta\text{-4GlcNAc}\beta\text{-4GlcNAc}\text{-DH} \\   \\ \text{Man}\alpha\text{-3} \end{array}$                                                                                                                                                                                                                     | 2,243 | 1,883 |
| 246 | Man4bGN2                      | $\begin{array}{c} \text{Man}\alpha\text{-6} \\   \\ \text{Man}\alpha\text{-3Man}\alpha\text{-6} \\   \\ \text{Man}\beta\text{-4GlcNAc}\beta\text{-4GlcNAc}\text{-DH} \end{array}$                                                                                                                                                                                                                                            | 684   | 884   |
| 247 | Man5GN2                       | $\begin{array}{c} \text{Man}\alpha\text{-6} \\   \\ \text{Man}\alpha\text{-3Man}\alpha\text{-6} \\   \\ \text{Man}\beta\text{-4GlcNAc}\beta\text{-4GlcNAc}\text{-DH} \\   \\ \text{Man}\alpha\text{-3} \end{array}$                                                                                                                                                                                                          | 1,815 | 2,001 |
| 248 | Man6GN2                       | $\begin{array}{c} \text{Man}\alpha\text{-6} \\   \\ \text{Man}\alpha\text{-3Man}\alpha\text{-6} \\   \\ \text{Man}\beta\text{-4GlcNAc}\beta\text{-4GlcNAc}\text{-DH} \\   \\ \text{Man}\alpha\text{-2Man}\alpha\text{-3} \end{array}$                                                                                                                                                                                        | 523   | 879   |
| 249 | Man7(D1)GN2                   | $\begin{array}{c} \text{Man}\alpha\text{-6} \\   \\ \text{Man}\alpha\text{-3Man}\alpha\text{-6} \\   \qquad \qquad \qquad   \\ \text{Man}\beta\text{-4GlcNAc}\beta\text{-4GlcNAc}\text{-DH} \\   \\ \text{Man}\alpha\text{-2Man}\alpha\text{-2Man}\alpha\text{-3} \end{array}$                                                                                                                                               | 893   | 205   |
| 250 | Man7(D1)GN2-AO                | $\begin{array}{c} \text{Man}\alpha\text{-6} \\   \\ \text{Man}\alpha\text{-3Man}\alpha\text{-6} \\   \qquad \qquad \qquad   \\ \text{Man}\beta\text{-4GlcNAc}\beta\text{-4GlcNAc}\text{-AO} \\   \\ \text{Man}\alpha\text{-2Man}\alpha\text{-2Man}\alpha\text{-3} \end{array}$                                                                                                                                               | 5,519 | 935   |
| 251 | Man7(D3)GN2                   | $\begin{array}{c} \text{Man}\alpha\text{-6} \\   \\ \text{Man}\alpha\text{-3Man}\alpha\text{-6} \\   \\ \text{Man}\beta\text{-4GlcNAc}\beta\text{-4GlcNAc}\text{-DH} \\   \\ \text{Man}\alpha\text{-2Man}\alpha\text{-3} \end{array}$                                                                                                                                                                                        | 680   | 1,210 |
| 252 | Man8(D1D3)GN2                 | $\begin{array}{c} \text{Man}\alpha\text{-2Man}\alpha\text{-6} \\   \\ \text{Man}\alpha\text{-3Man}\alpha\text{-6} \\   \qquad \qquad \qquad   \\ \text{Man}\beta\text{-4GlcNAc}\beta\text{-4GlcNAc}\text{-DH} \\   \\ \text{Man}\alpha\text{-2Man}\alpha\text{-2Man}\alpha\text{-3} \end{array}$                                                                                                                             | 275   | 603   |
| 253 | Man9GN2                       | $\begin{array}{c} \text{Man}\alpha\text{-2Man}\alpha\text{-6} \\   \\ \text{Man}\alpha\text{-2Man}\alpha\text{-3Man}\alpha\text{-6} \\   \qquad \qquad \qquad   \\ \text{Man}\beta\text{-4GlcNAc}\beta\text{-4GlcNAc}\text{-DH} \\   \\ \text{Man}\alpha\text{-2Man}\alpha\text{-2Man}\alpha\text{-3} \end{array}$                                                                                                           | 153   | 631   |

|     |                    |                                                                                                                                                                                                                                                                                                |       |       |
|-----|--------------------|------------------------------------------------------------------------------------------------------------------------------------------------------------------------------------------------------------------------------------------------------------------------------------------------|-------|-------|
| 254 | Man9GN2-AO         | <pre>       Mana-2Mana-6               Mana-2Mana-3Mana-6               ManB-4GlcNAcB-4GlcNAc-AO               Mana-2Mana-2Mana-3               Mana-2Mana-6               Mana-6               Mana-2Mana-3  ManB-4GlcNAcB-4GlcNAc-DH               GlcA-3Mana-2Mana-2Mana-3           </pre> | 1,725 | 2,001 |
| 255 | Glc1Man9GN2        | <pre>       Mana-2Mana-6               Mana-6               Mana-2Mana-3  ManB-4GlcNAcB-4GlcNAc-DH               GlcA-3Mana-2Mana-2Mana-3           </pre>                                                                                                                                     | 322   | 1,217 |
| 256 | Glc1Man9GN2-AO     | <pre>       Mana-2Mana-6               Mana-6               Mana-2Mana-3  ManB-4GlcNAcB-4GlcNAc-AO               GlcA-3Mana-2Mana-2Mana-3           </pre>                                                                                                                                     | 1,275 | 1,025 |
| 257 | Glc2Man9GN2-AO     | <pre>       Mana-2Mana-6               Mana-6               Mana-2Mana-3  ManB-4GlcNAcB-4GlcNAc-AO               GlcA-3GlcA-3Mana-2Mana-2Mana-3           </pre>                                                                                                                               | 2,687 | 1,692 |
| 258 | Glc2Man7(D1)GN1-AO | <pre>       Mana-6               Mana-3Mana-6               ManB-4GlcNAc-AO               GlcA-3GlcA-3Mana-2Mana-2Mana-3           </pre>                                                                                                                                                      | 3,037 | 2,014 |
| 259 | Glc3Man7(D1)GN1-AO | <pre>       Mana-6               Mana-3Mana-6               ManB-4GlcNAc-AO               GlcA-2GlcA-3GlcA-3Mana-2Mana-2Mana-3           </pre>                                                                                                                                                | 2,825 | 1,828 |
| 260 | Man3XylGN2         | <pre>       Mana-6               XylB-2ManB-4GlcNAcB-4GlcNAc-DH               Mana-3           </pre>                                                                                                                                                                                          | 603   | 2,018 |
| 261 | N1                 | <pre>       GalB-4GlcNAcB-2Mana-6  Fuca-6               ManB-4GlcNAcB-4GlcNAc-DH               Mana-3           </pre>                                                                                                                                                                         | 798   | 2,170 |
| 262 | N2                 | <pre>       Mana-6               ManB-4GlcNAcB-4GlcNAc-DH               GalB-4GlcNAcB-2Mana-3           </pre>                                                                                                                                                                                 | 448   | 1,394 |
| 263 | N4                 | <pre>       GalB-4GlcNAcB-2Mana-6               ManB-4GlcNAcB-4GlcNAc-DH               Mana-3           </pre>                                                                                                                                                                                 | 937   | 1,966 |
| 264 | GlcNac2Man3-AO     | <pre>       GlcNAcB-2Mana-6               Man-AO               GlcNAcB-2Mana-3           </pre>                                                                                                                                                                                                | 2,083 | 1,203 |
| 265 | N3                 | <pre>       GlcNAcB-2Mana-6  Fuca-6               GalB-4  ManB-4GlcNAcB-4GlcNAc-DH               GlcNAcB-2Mana-3           </pre>                                                                                                                                                              | 106   | 939   |
| 266 | NGA2               | <pre>       GlcNAcB-2Mana-6               ManB-4GlcNAcB-4GlcNAc-DH               GlcNAcB-2Mana-3           </pre>                                                                                                                                                                              | 278   | 1,267 |
| 267 | NGA2B              | <pre>       GlcNAcB-2Mana-6               GlcNAcB-4ManB-4GlcNAcB-4GlcNAc-DH               GlcNAcB-2Mana-3           </pre>                                                                                                                                                                     | 121   | 1,467 |
| 268 | NGA3B              | <pre>       GlcNAcB-2Mana-6               GlcNAcB-4ManB-4GlcNAcB-4GlcNAc-DH               GlcNAcB-4Mana-3               GlcNAcB-2           </pre>                                                                                                                                             | -     | 1,288 |
| 269 | NGA4               | <pre>       GlcNAcB-6               GlcNAcB-2Mana-6               ManB-4GlcNAcB-4GlcNAc-DH               GlcNAcB-2Mana-3               GlcNAcB-4           </pre>                                                                                                                              | -     | 175   |
| 270 | NGA5B              | <pre>       GlcNAcB-2               GlcNAcB-4Mana-6               GlcNAcB-6               GlcNAcB-4ManB-4GlcNAcB-4GlcNAc-DH               GlcNAcB-4Mana-3               GlcNAcB-2           </pre>                                                                                             | -     | -     |
| 271 | GNMan5BGN2         | <pre>       Mana-6               Mana-3Mana-6               GlcNAcB-4ManB-4GlcNAcB-4GlcNAc-DH               GlcNAcB-2Mana-3           </pre>                                                                                                                                                   | 215   | 40    |
| 272 | NA2                | <pre>       GalB-4GlcNAcB-2Mana-6               ManB-4GlcNAcB-4GlcNAc-DH               GalB-4GlcNAcB-2Mana-3           </pre>                                                                                                                                                                  | -     | 1,317 |
| 273 | NA3                | <pre>       GalB-4GlcNAcB-2Mana-6               ManB-4GlcNAcB-4GlcNAc-DH               GalB-4GlcNAcB-4Mana-3               GalB-4GlcNAcB-2           </pre>                                                                                                                                    | -     | 689   |



|     |                  |                                                                                                                                      |       |       |
|-----|------------------|--------------------------------------------------------------------------------------------------------------------------------------|-------|-------|
| 274 | NA4              | Galβ-4GlcNAcβ-6<br> <br>Galβ-4GlcNAcβ-2Manα-6<br> <br>Manβ-4GlcNAcβ-4GlcNAc-DH<br> <br>Galβ-4GlcNAcβ-4Manα-3<br> <br>Galβ-4GlcNAcβ-2 | -     | 956   |
| 275 | Fuc-GlcNAc       | Fuca-6GlcNAc-DH<br> <br>Manα-6 Fuca-6<br> <br>Manβ-4GlcNAcβ-4GlcNAc-DH<br> <br>Manα-3                                                | 49    | 1,256 |
| 276 | Man3FGN2         | Manα-6<br> <br>Xylβ-2Manα-4GlcNAcβ-4GlcNAc-DH<br> <br>Manα-3 Fuca-3                                                                  | 4,473 | 3,407 |
| 277 | Man3FxyIGN2      | GlcNAcβ-2Manα-6 Fuca-6<br> <br>Manβ-4GlcNAcβ-4GlcNAc-DH<br> <br>GlcNAcβ-2Manα-3                                                      | 22    | 1,200 |
| 278 | NGA2F            | Galβ-4GlcNAcβ-2Manα-6 Fuca-6<br> <br>Manβ-4GlcNAcβ-4GlcNAc-DH<br> <br>Galβ-4GlcNAcβ-2Manα-3                                          | 375   | 2,096 |
| 279 | NA2F             | Galβ-4GlcNAcβ-2Manα-6 Fuca-6<br> <br>Manβ-4GlcNAcβ-4GlcNAc-DH<br> <br>Galβ-4GlcNAcβ-2Manα-3                                          | -     | 772   |
| 280 | NA2F-AO          | Galβ-4GlcNAcβ-2Manα-6 Fuca-6<br> <br>Manβ-4GlcNAcβ-4GlcNAc-AO<br> <br>Galβ-4GlcNAcβ-2Manα-3                                          | -     | 2,377 |
| 281 | NA2FB            | Galβ-4GlcNAcβ-2Manα-6 Fuca-6<br> <br>GlcNAcβ-4Manβ-4GlcNAcβ-4GlcNAc-DH<br> <br>Galβ-4GlcNAcβ-2Manα-3                                 | -     | 2,266 |
| 282 | NA3-Lex          | Galβ-4GlcNAcβ-2Manα-6<br> <br>Manβ-4GlcNAcβ-4GlcNAc-DH<br> <br>Galβ-4GlcNAcβ-4Manα-3<br> <br>Galβ-4GlcNAcβ-2                         | -     | 1,289 |
| 283 | A2(2-6)          | NeuAcα-6Galβ-4GlcNAcβ-2Manα-6<br> <br>Manβ-4GlcNAcβ-4GlcNAc-DH<br> <br>NeuAcα-6Galβ-4GlcNAcβ-2Manα-3                                 | -     | 599   |
| 284 | AGP-Bi-Ac2       | NeuAcα-6Galβ-4GlcNAcβ-2Manα-6<br> <br>Manβ-4GlcNAcβ-4GlcNAc-DH<br> <br>NeuAcα-6Galβ-4GlcNAcβ-2Manα-3                                 | -     | -     |
| 285 | AGP-Bi-Gc2       | NeuGcα-6Galβ-4GlcNAcβ-2Manα-6<br> <br>Manβ-4GlcNAcβ-4GlcNAc-DH<br> <br>NeuGcα-6Galβ-4GlcNAcβ-2Manα-3                                 | 96    | -     |
| 286 | AGP-Bi-AcGc      | NeuAcα-6Galβ-4GlcNAcβ-2Manα-6<br> <br>Manβ-4GlcNAcβ-4GlcNAc-DH<br> <br>NeuAcα-3Galβ-4GlcNAcβ-2Manα-6                                 | -     | -     |
| 287 | A3               | NeuAcα-3Galβ-4GlcNAcβ-4Manα-3<br> <br>Manβ-4GlcNAcβ-4GlcNAc-DH<br> <br>NeuAcα-6Galβ-4GlcNAcβ-2                                       | -     | -     |
| 288 | A2F(2-3)         | NeuAcα-3Galβ-4GlcNAcβ-2Manα-6 Fuca-6<br> <br>Manβ-4GlcNAcβ-4GlcNAc-DH<br> <br>NeuAcα-3Galβ-4GlcNAcβ-2Manα-3                          | -     | 1,213 |
| 289 | GM4              | NeuAcα-3Galβ-Cer                                                                                                                     | -     | 1,613 |
| 290 | SM3              | SU-3Galβ-4Glcβ-Cer                                                                                                                   | -     | 1,488 |
| 291 | Haematoside      | NeuAcα-3Galβ-4Glcβ-Cer                                                                                                               | -     | 1,038 |
| 292 | GM3              | NeuAcα-3Galβ-4Glcβ-Cer                                                                                                               | 142   | 1,335 |
| 293 | GM3(Gc)          | NeuGcα-3Galβ-4Glcβ-Cer                                                                                                               | 383   | 2,127 |
| 294 | Asialo-GM2       | GalNAcβ-4Galβ-4Glcβ-Cer<br> <br>GalNAcβ-4Galβ-4Glcβ-Cer                                                                              | 246   | 1,004 |
| 295 | SM2              | SU-3                                                                                                                                 | -     | -     |
| 296 | SB2              | SU-3GalNAcβ-4Galβ-4Glcβ-Cer<br> <br>SU-3                                                                                             | 29    | 547   |
| 297 | GM2              | GalNAcβ-4Galβ-4Glcβ-Cer<br> <br>NeuAcα-3                                                                                             | -     | 675   |
| 298 | GSC-576          | GalNAcβ-4Galβ-3Glcβ-C30<br> <br>NeuAcα-3                                                                                             | -     | 863   |
| 299 | GSC-108          | GalNAcβ-4Galβ-4Glcβ-Cer36<br> <br>NeuAcα-3                                                                                           | -     | 1,135 |
| 300 | GSC-193          | GalNAcβ-4Galβ-4Glcβ-Cer36<br> <br>KDNα-3                                                                                             | -     | 559   |
| 301 | Asialo-GM1       | Galβ-3GalNAcβ-4Galβ-4Glcβ-Cer                                                                                                        | -     | 297   |
| 302 | Asialo-GM1-Tetra | Galβ-3GalNAcβ-4Galβ-4Glcβ-DH<br> <br>Galβ-3GalNAcβ-4Galβ-4Glcβ-Cer                                                                   | -     | 995   |
| 303 | SM1a             | SU-3                                                                                                                                 | -     | 783   |
| 304 | SB1a             | SU-3Galβ-3GalNAcβ-4Galβ-4Glcβ-Cer<br> <br>SU-3                                                                                       | -     | 397   |
| 305 | GSC-335          | SU-6<br> <br>NeuAcα-3Galβ-3GalNAcβ-4Galβ-4Glcβ-Cer36<br> <br>Galβ-3GalNAcβ-4Galβ-4Glcβ-Cer                                           | -     | 1,369 |
| 306 | GM1              | NeuAcα-3                                                                                                                             | -     | 1,721 |
| 307 | GM1-penta        | Galβ-3GalNAcβ-4Galβ-4Glcβ-DH<br> <br>NeuAcα-3                                                                                        | -     | 666   |

|     |                    |                                                                                                                                                      |        |       |
|-----|--------------------|------------------------------------------------------------------------------------------------------------------------------------------------------|--------|-------|
| 308 | GM1(Gc)            | Galβ-3GalNAcβ-4Galβ-4Glcβ-Cer<br> <br>NeuGcα-3                                                                                                       | -      | 785   |
| 309 | GM1(Gc)-penta      | Galβ-3GalNAcβ-4Galβ-4Glc-DH<br> <br>NeuGcα-3                                                                                                         | -      | 170   |
| 310 | GD1a               | NeuAcα-3Galβ-3GalNAcβ-4Galβ-4Glcβ-Cer<br> <br>NeuAcα-3                                                                                               | -      | 32    |
| 311 | GD1a-hexa          | NeuAcα-3Galβ-3GalNAcβ-4Galβ-4Glc-DH<br> <br>NeuAcα-3                                                                                                 | -      | -     |
| 312 | GalNAc-GD1a(Ac,Gc) | GalNAcβ-4Galβ-3GalNAcβ-4Galβ-4Glcβ-Cer<br> <br>NeuGcα-3<br> <br>NeuAcα-3<br>GalNAcβ-4Galβ-3GalNAcβ-4Galβ-4Glcβ-Cer<br> <br>NeuAcα-3<br> <br>NeuGcα-3 | -      | 459   |
| 313 | GSC-195            | KDNα-3Galβ-3GalNAcβ-4Galβ-4Glcβ-Cer36<br> <br>KDNα-3                                                                                                 | -      | 653   |
| 314 | GD3                | NeuAcα-8NeuAcα-3Galβ-4Glcβ-Cer                                                                                                                       | -      | 498   |
| 315 | GD3-tetra          | NeuAcα-8NeuAcα-3Galβ-4Glc-DH                                                                                                                         | 18     | 147   |
| 316 | GD3-tetra-AO       | NeuAcα-8NeuAcα-3Galβ-4Glc-AO                                                                                                                         | 371    | 793   |
| 317 | GD2                | GalNAcβ-4Galβ-4Glcβ-Cer<br> <br>NeuAcα-8NeuAcα-3                                                                                                     | -      | 615   |
| 318 | GD1b               | Galβ-3GalNAcβ-4Galβ-4Glcβ-Cer<br> <br>NeuAcα-8NeuAcα-3                                                                                               | -      | -     |
| 319 | GT1a               | NeuAcα-8NeuAcα-3Galβ-3GalNAcβ-4Galβ-4Glcβ-Cer<br> <br>NeuAcα-3                                                                                       | -      | 340   |
| 320 | GT1b               | NeuAcα-3Galβ-3GalNAcβ-4Galβ-4Glcβ-Cer<br> <br>NeuAcα-8NeuAcα-3                                                                                       | -      | 488   |
| 321 | GQ1b               | NeuAcα-8NeuAcα-3Galβ-3GalNAcβ-4Galβ-4Glcβ-Cer<br> <br>NeuAcα-8NeuAcα-3                                                                               | -      | -     |
| 322 | GSC-442            | GalNAcβ-4Galβ-4Glcβ-Cer36<br> <br>NeuAcα-6                                                                                                           | -      | 878   |
| 323 | GSC-68             | NeuAcα-6Galβ-3GalNAcβ-4Galβ-4Glcβ-Cer36                                                                                                              | -      | -     |
| 324 | GSC-107            | NeuAcα-6Galβ-3GalNAcβ-4Galβ-4Glcβ-Cer36<br> <br>NeuAcα-6                                                                                             | -      | 575   |
| 325 | GSC-118            | NeuAcα-3Galβ-3GalNAcβ-4Galβ-4Glcβ-Cer36<br> <br>NeuAcα-6                                                                                             | 148    | 1,413 |
| 326 | GalNAc-Ser         | GalNAc-Ser                                                                                                                                           | 86     | 1,246 |
| 327 | GalNAc-Thr         | GalNAc-Thr                                                                                                                                           | 181    | 790   |
| 328 | BSM-Di-A1-AO       | NeuGcα-6GalNAc-AO                                                                                                                                    | -      | 524   |
| 329 | BSM-Di-A2-AO       | NeuAcα-6GalNAc-AO                                                                                                                                    | -      | 1,184 |
| 330 | GalNAcα-3GalNAc    | GalNAcα-3GalNAc-DH                                                                                                                                   | 94     | 2,479 |
| 331 | Galβ-3GalNAc       | Galβ-3GalNAc-DH                                                                                                                                      | 199    | 1,732 |
| 332 | Galβ-3GalNAc-AO    | Galβ-3GalNAc-AO                                                                                                                                      | 431    | 1,650 |
| 333 | Galβ-6GalNAc       | Galβ-6GalNAc-DH                                                                                                                                      | -      | 983   |
| 334 | Galβ-6GalNAc-AO    | Galβ-6GalNAc-AO                                                                                                                                      | 570    | 2,121 |
| 335 | Man-Ser            | Manα-Ser                                                                                                                                             | 20,962 | 2,091 |
| 336 | Man-Ser-Succ       | Man-Ser-Succ                                                                                                                                         | 17,989 | 1,931 |
| 337 | Man-Thr            | Man-Thr                                                                                                                                              | 20,770 | 1,275 |
| 338 | Man-Thr-Succ       | Man-Thr-Succ                                                                                                                                         | 23,140 | 1,279 |
| 339 | A8/1               | GlcNAcα-4Galβ-OX                                                                                                                                     | 1,145  | 1,727 |
| 340 | A8/2               | SU-6<br> <br>Fuca-3GlcNAcβ-OY                                                                                                                        | 426    | 1,291 |
| 341 | A15/1              | SU-6GlcNAcβ-OY                                                                                                                                       | 673    | 1,625 |
| 342 | A15/3              | GlcNAcα-4Galβ-3Galβ-OX<br> <br>Fuca-2                                                                                                                | 151    | 1,987 |
| 343 | B13/a              | GlcAβ-3Galβ-3GlcNAcβ-OX                                                                                                                              | -      | 777   |
| 344 | Notch-1            | Fuca-Thr                                                                                                                                             | 1,061  | 2,999 |
| 345 | Notch-2            | GlcNAcβ-3Fuca-Thr                                                                                                                                    | 420    | 1,577 |
| 346 | Notch-3            | Galβ-4GlcNAcβ-3Fuca-Thr                                                                                                                              | -      | 486   |
| 347 | GSC-488            | NeuAcα-3Galβ-3GalNAcβ-C30                                                                                                                            | -      | 450   |
| 348 | GSC-491            | NeuAcα-3Galβ-3 (6-deoxy-6-CH2COOH) GalNAcβ-C30                                                                                                       | 18     | 244   |
| 349 | GSC-489            | SU-6<br> <br>NeuAcα-3Galβ-3GalNAcβ-C30<br> <br>NeuAcα-3Galβ-3GalNAc-DH                                                                               | -      | -     |
| 350 | DST                | NeuAcα-6<br> <br>NeuAcα-3Galβ-3GalNAc-AO                                                                                                             | -      | -     |
| 351 | DST-AO             | NeuAcα-6<br> <br>NeuAcα-3Galβ-3GalNAcβ-C30                                                                                                           | 21     | 125   |
| 352 | GSC-490            | NeuAcα-6                                                                                                                                             | -      | 269   |
| 353 | GlcNAcβ-3Fuc-AO    | GlcNAcβ1-3Fuc-AO                                                                                                                                     | 1,110  | 2,143 |
| 354 | GlcNAcβ1-2Fuc-AO   | GlcNAcβ1-2Fuc-AO                                                                                                                                     | 1,483  | 1,998 |
| 355 | GlcNAcβ1-4Fuc-AO   | GlcNAcβ1-4Fuc-AO                                                                                                                                     | 2,860  | 2,078 |
| 356 | GlcNAcβ-2Man-AO    | GlcNAcβ-2Man-AO                                                                                                                                      | 1,790  | 1,831 |
| 357 | SA2(α8)            | NeuAcα-8NeuAc-DH                                                                                                                                     | -      | 1,073 |
| 358 | SA3(α8)            | NeuAcα-8NeuAcα-8NeuAc-DH                                                                                                                             | 45     | 1,238 |
| 359 | SA4(α8)            | NeuAcα-8NeuAcα-8NeuAcα-8NeuAc-DH                                                                                                                     | -      | -     |
| 360 | SA5(α8)            | NeuAcα-8NeuAcα-8NeuAcα-8NeuAcα-8NeuAc-DH**                                                                                                           | -      | -     |
| 361 | SA6(α8)            | NeuAcα-8NeuAcα-8NeuAcα-8NeuAcα-8NeuAcα-8NeuAc-DH**                                                                                                   | -      | 71    |
| 362 | SA7(α8)            | NeuAcα-8NeuAcα-8NeuAcα-8NeuAcα-8NeuAcα-8NeuAcα-8NeuAc-DH**                                                                                           | -      | 79    |
| 363 | SA8(α8)            | NeuAcα-8NeuAcα-8NeuAcα-8NeuAcα-8NeuAcα-8NeuAcα-8NeuAcα-8NeuAc-DH**                                                                                   | -      | 190   |
| 364 | SA9(α8)            | NeuAcα-8NeuAcα-8NeuAcα-8NeuAcα-8NeuAcα-8NeuAcα-8NeuAcα-8NeuAcα-8NeuAc-DH**                                                                           | -      | -     |
| 365 | SA10(α8)           | NeuAcα-8NeuAcα-8NeuAcα-8NeuAcα-8NeuAcα-8NeuAcα-8NeuAcα-8NeuAcα-8NeuAcα-8NeuAc-DH**                                                                   | -      | -     |
| 366 | HA-S4              | GlcAβ-3GlcNAcβ-4GlcAβ-3GlcNAc-DH                                                                                                                     | -      | 546   |



|     |                  |                                                                                     |       |       |
|-----|------------------|-------------------------------------------------------------------------------------|-------|-------|
| 434 | Cello-2-AO       | GlcB-4Glc-AO                                                                        | 772   | 2,315 |
| 435 | Cello-3-AO       | GlcB-4GlcB-4Glc-AO                                                                  | 572   | 1,713 |
| 436 | Cello-4-AO       | GlcB-4GlcB-4GlcB-4Glc-AO                                                            | 373   | 2,519 |
| 437 | Cello-5-AO       | GlcB-4GlcB-4GlcB-4GlcB-4Glc-AO                                                      | -     | 2,729 |
| 438 | Cello-6-AO       | GlcB-4GlcB-4GlcB-4GlcB-4GlcB-4Glc-AO                                                | 894   | 2,044 |
| 439 | Cello-8-AO       | GlcB-4GlcB-4GlcB-4GlcB-4GlcB-4GlcB-4GlcB-4Glc-AO**                                  | 624   | 2,149 |
| 440 | Cello-9-AO       | GlcB-4GlcB-4GlcB-4GlcB-4GlcB-4GlcB-4GlcB-4GlcB-4Glc-AO**                            | 892   | 1,923 |
| 441 | Cello-10-AO      | GlcB-4GlcB-4GlcB-4GlcB-4GlcB-4GlcB-4GlcB-4GlcB-4GlcB-4Glc-AO**                      | 13    | 867   |
| 442 | Cello-11-AO      | GlcB-4GlcB-4GlcB-4GlcB-4GlcB-4GlcB-4GlcB-4GlcB-4GlcB-4GlcB-4Glc-AO**                | 293   | 3,580 |
| 443 | Cello-12-AO      | GlcB-4GlcB-4GlcB-4GlcB-4GlcB-4GlcB-4GlcB-4GlcB-4GlcB-4GlcB-4GlcB-4Glc-AO**          | 326   | 1,529 |
| 444 | Cello-13-AO      | GlcB-4GlcB-4GlcB-4GlcB-4GlcB-4GlcB-4GlcB-4GlcB-4GlcB-4GlcB-4GlcB-4GlcB-4Glc-AO**    | 144   | 2,316 |
| 445 | Pust-2-AO        | GlcB-6Glc-AO                                                                        | 6,311 | 2,851 |
| 446 | Pust-3-AO        | GlcB-6GlcB-6Glc-AO                                                                  | 2,182 | 2,730 |
| 447 | Pust-4-AO        | GlcB-6GlcB-6GlcB-6Glc-AO                                                            | 1,230 | 2,195 |
| 448 | Pust-5-AO        | GlcB-6GlcB-6GlcB-6GlcB-6Glc-AO                                                      | 1,110 | 1,518 |
| 449 | Pust-6-AO        | GlcB-6GlcB-6GlcB-6GlcB-6GlcB-6Glc-AO                                                | 374   | 2,378 |
| 450 | Pust-7-AO        | GlcB-6GlcB-6GlcB-6GlcB-6GlcB-6GlcB-6Glc-AO                                          | 650   | 2,502 |
| 451 | Pust-8-AO        | GlcB-6GlcB-6GlcB-6GlcB-6GlcB-6GlcB-6GlcB-6Glc-AO                                    | 788   | 2,550 |
| 452 | Pust-9-AO        | GlcB-6GlcB-6GlcB-6GlcB-6GlcB-6GlcB-6GlcB-6GlcB-6Glc-AO                              | 1,253 | 2,505 |
| 453 | Glc2B(2).AO      | GlcB-2Glc-AO                                                                        | 574   | 1,784 |
| 454 | Gal              | Gal-DH                                                                              | -     | 1,700 |
| 455 | Gal-AO           | Gal-AO                                                                              | 661   | 3,003 |
| 456 | GalNAc           | GalNAc-DH                                                                           | 222   | 1,703 |
| 457 | GalNAc-AO        | GalNAc-AO                                                                           | 2,021 | 2,533 |
| 458 | Glc              | Glc-DH                                                                              | 219   | 1,696 |
| 459 | Glc-AO           | Glc-AO                                                                              | 861   | 2,172 |
| 460 | GN               | GlcNAc-DH                                                                           | 159   | 1,052 |
| 461 | GN-AO            | GlcNAc-AO                                                                           | 2,726 | 3,423 |
| 462 | Man              | Man-DH                                                                              | 1,902 | 2,563 |
| 463 | Man-AO           | Man-AO                                                                              | 277   | 734   |
| 464 | Fuc              | Fuc-DH                                                                              | 392   | 880   |
| 465 | Fuc-AO           | Fuc-AO                                                                              | 1,082 | 1,866 |
| 466 | NeuAc            | NeuAc-DH                                                                            | 20    | 644   |
| 467 | NeuAc-AO         | NeuAc-AO                                                                            | 635   | 963   |
| 468 | NeuGc            | NeuGc-DH                                                                            | -     | 1,653 |
| 469 | NeuGc-AO         | NeuGc-AO                                                                            | 659   | 1,767 |
| 470 | Rha              | Rha-DH                                                                              | 251   | 1,668 |
| 471 | Rha-AO           | Rha-AO                                                                              | 1,636 | 2,969 |
| 472 | Gala-6Glc-AO     | Gala-6Glc-AO                                                                        | 117   | 1,480 |
| 473 | (6P)-Glc-AO      | P-6Glc-AO                                                                           | 743   | 2,421 |
| 474 | (6P)-Man         | P-6Man-DH                                                                           | 649   | 1,904 |
| 475 | (6P)-Man-AO      | P-6Man-AO                                                                           | 1,415 | 2,315 |
| 476 | (6P)-Man5        | P-6Man $\alpha$ -3Man $\alpha$ -3Man $\alpha$ -3Man $\alpha$ -2Man-DH               | 3,714 | 1,091 |
| 477 | (6P)-Fructose-AO | P-6Fru-AO                                                                           | 472   | 2,843 |
| 478 | SU-Tyr           | SU-Tyr                                                                              | 1,960 | 2,350 |
| 479 | SU-Cholesterol   | SU-Cholesterol                                                                      | 278   | 2,519 |
| 480 | GN-Asn           | GlcNAc-Asn                                                                          | 6,386 | 2,644 |
| 481 | Xyl3Glc4         | 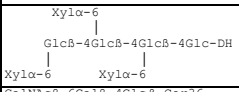 | -     | 1,435 |
| 482 | GSC-284          |  | -     | 1,281 |
| 483 | GSC-575          |  | -     | -     |
| 484 | GSC-70           |  | -     | 1,064 |
| 485 | GSC-154          |  | -     | 1,695 |
| 486 | GSC-446          |  | -     | 741   |
| 487 | GSC-441          |  | -     | 1,114 |
| 488 | GSC-384          |  | -     | 414   |
| 489 | Glc(α6,α4,α4)    | Glcα-6Glcα-4Glcα-4Glc-DH                                                            | 182   | 1,331 |
| 490 | Glc(α6,α4,α4)-AO | Glcα-6Glcα-4Glcα-4Glc-AO                                                            | 1,069 | 2,229 |
| 491 | O1.AO            |  | 1,589 | 1,365 |
| 492 | Rutinose.AO      | Rhaα-6Glc-AO                                                                        | 521   | 1,185 |

-, less than 1.

\*, Average fluorescence intensity of the duplicate spots.

\*\* , Major component.

The oligosaccharide probes are all lipid-linked. Unless otherwise indicated they are NGLs prepared from reducing oligosaccharides by reductive amination with the amino lipid, 1,2-dihexadecyl-*sn*-glycero-3-phosphoethanolamine (DHPE). AO, NGLs prepared from reducing oligosaccharides by oxime ligation with an aminoxy (AO) functionalized DHPE (Liu et al., Chem. Biol. 14, 847-859, 2007); Cer, natural glycolipids with various ceramide moieties; Cer36, synthetic glycolipids with ceramide having a total of 36 carbon atoms; C30, a synthetic lipid [2-(tetradecyl)hexadecanol] with 30 carbon atoms. OX and OY designate, respectively, the C1-4 fragment and the C5-6 fragments of GalNAc of reduced oligosaccharides after mild periodate oxidation followed by reductive amination with DHPE (Chai et al., Methods Enzymol. 362, 160-195, 2003). ΔUA, 4,5-unsaturated hexuronic acid; aMan, 2,5-anhydro-mannose; aGal, 3,6-
